# Supplementary material for: Trigonal propeller-shaped [MnIII3MIINa] complexes (M = Mn, Ca): structural and functional models for the dioxygen evolving centre of PSII
Source: Royal Society of Chemistry journal article supplement (doi:10.1039/c0dt01463j), 2011-01-01
Supplement: c0dt01463j.pdf [file c0dt01463j.pdf]

Supporting Information to the paper entitled:

**Trigonal Propeller-shaped  $\text{Mn}^{\text{III}}_3\text{M}^{\text{II}}\text{Na}$  Complexes (M = Mn, Ca):  
Structural and Functional Models for the Dioxygen Evolving Centre  
of PSII**

*Sanjit Nayak, Hari Pada Nayek, Stefanie Dehnen, Annie K. Powell, and Jan Reedijk\**

---

**List of contents:**

Table S1: Relevant M-M and M-L distances in compounds **1** and **2**.

Table S2: List of bond lengths in compound **1**.

Table S3: List of important bond angles in compound **1**.

Table S4: List of bond lengths in compound **2**.

Table S5: List of important bond angles in compound **2**.

Figure S1. The cyclic voltammetry plot for compound **2**.

Figure S2. Detection of  $^{18}\text{O}$  during dioxygen evolution study using labeled isotope of water using online mass spectroscopy.

Figure S3. Illustration of the spin density.

**Table S1:** Relevant M-M and M-L distances in compounds **1** and **2** (in Å)

|                   |                                     |           |                             |           |                                      |           |
|-------------------|-------------------------------------|-----------|-----------------------------|-----------|--------------------------------------|-----------|
| <i>Compound 1</i> | Mn <sup>III</sup> -Mn <sup>II</sup> | 3.56-3.60 | Mn <sup>III</sup> -Na       | 3.25-3.31 | Mn <sup>II</sup> -O                  | 2.08-2.22 |
|                   | Mn <sup>III</sup> -O(oxide)         | 1.89-1.90 | Mn <sup>III</sup> -Cl       | 2.45-2.69 | Mn <sup>III</sup> -Mn <sup>III</sup> | 3.23-3.26 |
|                   | Mn <sup>III</sup> -N                | 1.97-1.98 | Na-Cl                       | 2.67      | Na-O                                 | 2.39-2.41 |
| <i>Compound 2</i> | Mn <sup>III</sup> -Ca               | 3.44-3.48 | Mn <sup>III</sup> -Na       | 3.75-3.80 | Ca-O                                 | 2.36-2.46 |
|                   | Mn <sup>III</sup> -O(oxide)         | 1.88-1.90 | Mn <sup>III</sup> -N(azide) | 2.27-2.36 | Mn <sup>III</sup> -Mn <sup>III</sup> | 3.10-3.11 |
|                   | Mn <sup>III</sup> -N                | 1.98-1.99 | Mn-O                        | 1.90-1.91 | Na-O                                 | 2.35-2.40 |

**Table S2:** List of bond lengths in compound 1.

| Atom 1 | Atom 2 | Distance  | Atom 1 | Atom 2 | Distance (Å) |
|--------|--------|-----------|--------|--------|--------------|
| Mn1    | Cl2    | 2.6672(9) | C6     | C124   | 1.417(6)     |
| Mn1    | Cl4    | 2.599(1)  | C7     | C16    | 1.419(5)     |
| Mn1    | O12    | 1.900(2)  | C7     | H7     | 0.91(4)      |
| Mn1    | O1     | 1.899(2)  | C8     | C18    | 1.420(5)     |
| Mn1    | O4     | 1.893(3)  | C8     | C35    | 1.439(5)     |
| Mn1    | N8     | 1.975(3)  | C9     | H9     | 1.10(4)      |
| Mn2    | Cl4    | 2.689(1)  | C10    | H10    | 1.000(5)     |
| Mn2    | O1     | 1.904(2)  | C10    | C23    | 1.465(7)     |
| Mn2    | O2     | 1.884(2)  | C10    | C27    | 1.506(6)     |
| Mn2    | O3     | 1.910(2)  | C11    | H11    | 0.949(4)     |
| Mn2    | N2     | 1.975(3)  | C11    | C16    | 1.409(4)     |
| Mn2    | Cl7    | 2.453(2)  | C11    | C21    | 1.370(6)     |
| Mn4    | O22    | 2.112(3)  | C12    | H12    | 0.950(4)     |
| Mn4    | O2     | 2.136(2)  | C12    | C121   | 1.387(5)     |
| Mn4    | O4     | 2.086(3)  | C12    | C122   | 1.390(5)     |
| Mn4    | O5     | 2.215(3)  | C13    | C16    | 1.416(5)     |
| Mn4    | O6     | 2.204(3)  | C13    | C20    | 1.379(6)     |
| Mn4    | O9     | 2.223(3)  | C14    | H14    | 0.950(4)     |
| Mn3    | Cl2    | 2.582(1)  | C14    | C18    | 1.357(6)     |
| Mn3    | O11    | 1.914(2)  | C14    | C19    | 1.388(6)     |
| Mn3    | O1     | 1.896(2)  | C18    | H18    | 0.951(3)     |
| Mn3    | O22    | 1.883(3)  | C19    | H19    | 0.950(4)     |
| Mn3    | N7     | 1.986(3)  | C20    | H20    | 0.951(4)     |
| Mn3    | Cl7    | 2.635(2)  | C20    | C22    | 1.402(5)     |
| Cl3    | Na5    | 2.671(2)  | C21    | H21    | 0.950(3)     |
| O11    | C35    | 1.322(4)  | C21    | C22    | 1.388(6)     |
| O11    | Na5    | 2.415(2)  | C22    | H22    | 0.950(5)     |
| O12    | Na5    | 2.348(3)  | C23    | H23A   | 0.990(6)     |
| O12    | C121   | 1.333(4)  | C23    | H23B   | 0.989(4)     |
| O1     | Na5    | 2.401(2)  | C26    | H26A   | 0.991(4)     |
| O2     | C10    | 1.423(4)  | C26    | C28    | 1.395(8)     |
| O3     | C13    | 1.325(3)  | C27    | H27A   | 0.989(4)     |
| O3     | Na5    | 2.390(3)  | C27    | H27B   | 0.990(6)     |
| O4     | C234   | 1.474(6)  | C28    | C29    | 1.402(7)     |
| N2     | C7     | 1.280(4)  | C29    | H29A   | 0.990(6)     |
| N2     | C27    | 1.476(6)  | C29    | H29B   | 0.990(4)     |
| N7     | C45    | 1.287(5)  | C122   | H122   | 0.951(4)     |
| N7     | C26    | 1.466(5)  | C122   | C123   | 1.394(6)     |
| O5     | C23    | 1.434(5)  | C124   | H124   | 0.949(4)     |
| N8     | C9     | 1.286(5)  | C111   | C234   | 1.634(8)     |

|    |      |          |      |      |          |
|----|------|----------|------|------|----------|
| N8 | C111 | 1.465(5) | C234 | H234 | 0.999(5) |
| O9 | C236 | 1.375(8) | C236 | H23D | 0.991(6) |
| C6 | C9   | 1.426(5) | OW3  | CW3  | 1.28(2)  |
| C6 | C121 | 1.415(4) | OW2  | CW2  | 1.52(3)  |

**Table S3:** List of important bond angles in compound 1.

| Atom 1 | Atom 2 | Atom 3 | Angle 1-2-3 | Atom 1 | Atom 2 | Atom 3 | Angle 1-2-3 |
|--------|--------|--------|-------------|--------|--------|--------|-------------|
| Mn1    | Cl2    | Mn3    | 76.12(3)    | Mn2    | O1     | Na5    | 98.62(9)    |
| Mn1    | Cl4    | Mn2    | 76.13(3)    | Mn3    | O1     | Na5    | 100.39(9)   |
| Mn3    | O11    | Na5    | 99.36(9)    | Mn4    | O22    | Mn3    | 126.0(1)    |
| C35    | O11    | Na5    | 130.5(2)    | Mn2    | O2     | Mn4    | 127.1(1)    |
| Mn1    | O12    | Na5    | 99.6(1)     | Mn2    | O3     | Na5    | 98.84(9)    |
| Mn1    | O1     | Mn2    | 118.1(1)    | C13    | O3     | Na5    | 128.8(2)    |
| Mn1    | O1     | Mn3    | 117.1(1)    | Mn1    | O4     | Mn4    | 127.0(2)    |

**Table S4:** List of bond lengths in compound 2.

| Atom 1 | Atom 2 | Distance | Atom 1 | Atom 2 | Distance (Å) |
|--------|--------|----------|--------|--------|--------------|
| Mn1    | Mn3    | 3.112(1) | Mn3    | N3     | 1.976(6)     |
| Mn1    | O2     | 1.899(4) | Mn3    | N14    | 2.268(5)     |
| Mn1    | O3     | 1.881(4) | Mn3    | N17    | 2.304(5)     |
| Mn1    | O20    | 1.900(4) | Ca4    | O3     | 2.335(5)     |
| Mn1    | N1     | 1.982(5) | Ca4    | O4     | 2.407(6)     |
| Mn1    | N11    | 2.362(6) | Ca4    | O7     | 2.363(4)     |
| Mn1    | N17    | 2.324(5) | Ca4    | O8     | 2.445(7)     |
| Mn2    | Mn3    | 3.101(1) | Ca4    | O11    | 2.354(4)     |
| Mn2    | O6     | 1.908(4) | Ca4    | O12    | 2.439(8)     |
| Mn2    | O7     | 1.885(4) | Ca4    | O22    | 2.462(6)     |
| Mn2    | O20    | 1.898(4) | Na1    | O1     | 2.478(5)     |
| Mn2    | N2     | 1.983(5) | Na1    | O2     | 2.357(4)     |
| Mn2    | N13    | 2.339(5) | Na1    | O5     | 2.460(4)     |
| Mn2    | N14    | 2.333(5) | Na1    | O6     | 2.341(5)     |
| Mn3    | O10    | 1.914(4) | Na1    | O9     | 2.421(4)     |
| Mn3    | O11    | 1.887(4) | Na1    | O10    | 2.340(5)     |
| Mn3    | O20    | 1.928(4) | Na1    | O20    | 2.759(4)     |

**Table S5:** List of important bond angles in compound 2.

| Atom 1 | Atom 2 | Atom 3 | Angle 1-2-3 | Atom 1 | Atom 2 | Atom 3 | Angle 1-2-3 |
|--------|--------|--------|-------------|--------|--------|--------|-------------|
| Mn1    | O2     | Na1    | 109.5(2)    | Mn1    | O20    | Mn3    | 108.8(2)    |
| Mn1    | O3     | Ca4    | 125.2(2)    | Mn1    | O20    | Na1    | 95.0(2)     |
| Mn2    | O6     | Na1    | 107.7(2)    | Mn2    | O20    | Mn3    | 108.2(2)    |
| Mn2    | O7     | Ca4    | 126.6(2)    | Mn2    | O20    | Na1    | 93.4(2)     |

|     |     |     |          |     |     |     |         |
|-----|-----|-----|----------|-----|-----|-----|---------|
| Mn3 | O10 | Na1 | 108.0(2) | Mn3 | O20 | Na1 | 93.1(1) |
| Mn3 | O11 | Ca4 | 124.7(2) | Mn2 | N14 | Mn3 | 84.7(2) |
| Mn1 | O20 | Mn2 | 141.5(2) | Mn1 | N17 | Mn3 | 84.5(2) |

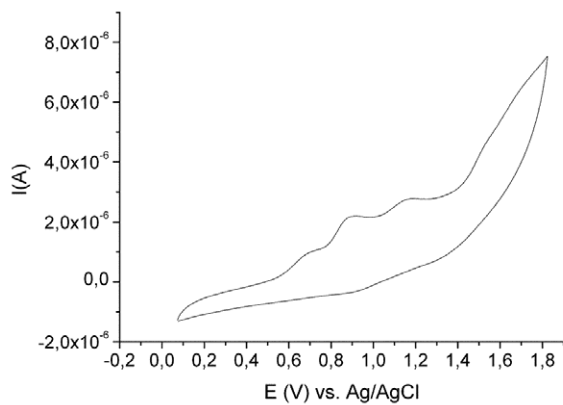

**Figure S1.** The cyclic voltammety plot for compound **2** against Ag/AgCl electrode in acetonitrile is shown.

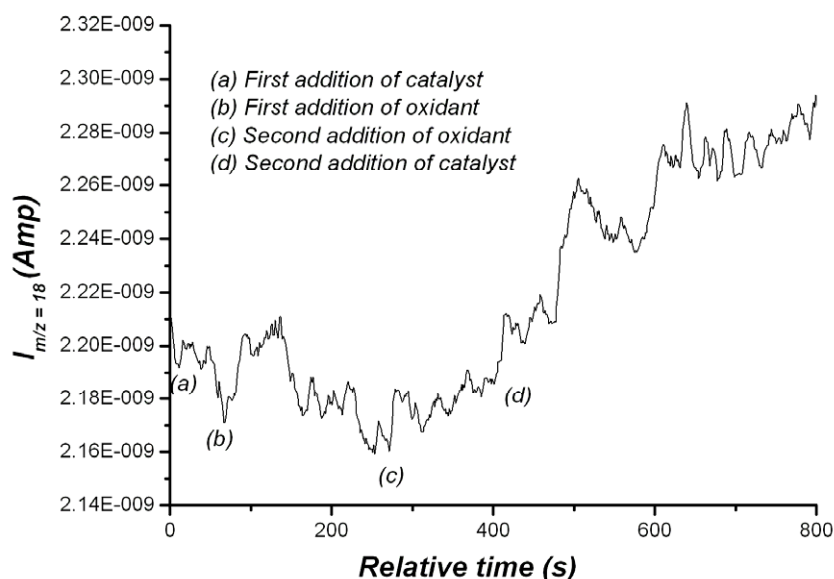

**Figure S2.** Detection of  $^{18}\text{O}$  during dioxygen evolution study using labeled isotope of water using online mass spectroscopy.

### Computational Studies:

In order to gain further insight in the electronic situation of both the  $[\text{Mn}^{\text{III}}_3\text{Ca}^{\text{II}}\text{Na}^{\text{I}}]$  and the  $[\text{Mn}^{\text{III}}_2\text{Mn}^{\text{IV}}\text{Ca}^{\text{II}}\text{Na}^{\text{I}}]$  system, density functional theory (DFT)<sup>1,2</sup> calculations of the cation in **2** were performed by employing the program system TURBOMOLE.<sup>3,4</sup> The simultaneous simulations of the electronic and geometric structure of the complex were based on the X-ray structural parameters.<sup>5-10</sup>

These studies revealed that the mono-cation of **2** is very likely to adopt an intermediate  $S = 4/2$  ground state, being energetically advantaged over the high spin  $S = 12/2$  state by  $10.7 \text{ kJ}\cdot\text{mol}^{-1}$ , which is again lower in energy than the low spin  $S = 0$  state by  $9.3 \text{ kJ}\cdot\text{mol}^{-1}$ . This was also evidenced from the experimental finding of the magnetization measurement of this compound (see SI for details) and compounds with a quite similar core.<sup>11</sup> In the  $S = 4/2$  state, the three  $d^4$  high-spin  $\text{Mn}^{3+}$  ions show magnetic frustration by two antiferromagnetic interactions and one ferromagnetic interaction along the  $\text{Mn}_3$  triangle. Other than may be expected, the magnetic interaction does not resemble the structural diversity in the  $\text{Mn}_3$  triangle: the only edge to be bridged by a  $\mu(\text{N}_3\text{-N}^1, \text{N}^3)^-$  ligand represents one of the antiferromagnetic edges, whereas the only ferromagnetic coupling arises along one of the two  $\mu(\text{N}_3\text{-N}^1, \text{N}^1)^-$  bridged edges. In the

ferromagnetic  $S = 12/2$  state all Mn ions have the same spin state and orientation and the  $S = 0$  state is realized by an alpha and beta spin distribution similar to the ground state  $S = 4/2$  situation, but with two Mn ions in intermediate  $s = 2/2$  spin states.

In Figure 6, the spin densities in these three cases are illustrated. In order to elucidate the most probable site of oxidation within a catalytic process, a vertical detachment of an electron has been calculated for the optimized ground state species with  $S = 4/2$ . As could be expected for the ionization of a cation, the di-cation is 0.72 eV higher in energy than the ground state. However, the natural bond orbital (NBO) analyses revealed that during the oxidation, most of the charge density is withdrawn from the O and N donor ligands, whereas the Mn atoms remain nearly unchanged in charge density.

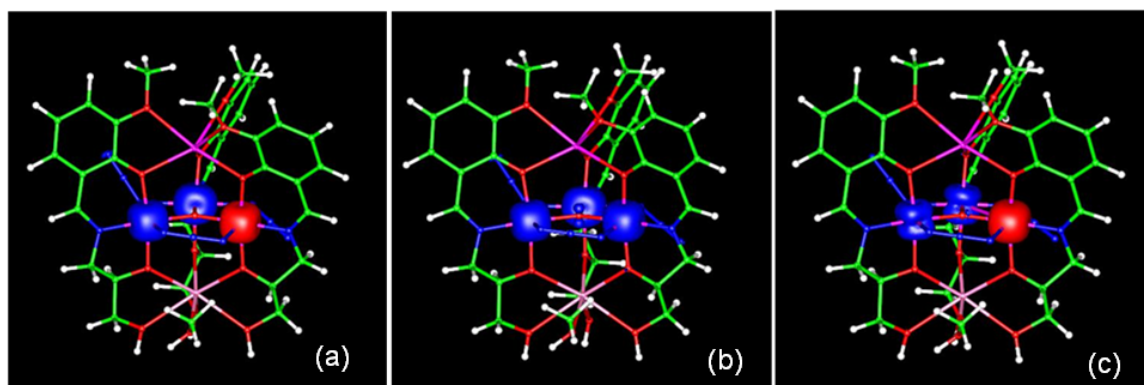

**Figure S3.** Illustration of the spin density (i.e. differences of the electron densities of  $\alpha$  (blue) and  $\beta$ -spins (red) for each atom, drawn to  $0.2 \text{ e}^- \cdot \text{\AA}^{-3}$ ), in the mono-cation in **2** at its  $S = 4/2$  ground state (a) and the  $S = 12/2$  (b) and  $S = 0$  (c) excited states. The pictures were generated using the program gOpenMol.<sup>12</sup>

1. R. G. Parr and W. Yang, *Density Functional Theory of Atoms and Molecules*, Oxford University Press, New York, 1988.
2. T. Ziegler, *Chem. Rev.*, 1991, **91**, 651-667.
3. R. Ahlrichs, M. Bar, M. Haser, H. Horn and C. Kolmel, *Chem. Phys. Lett.*, 1989, **162**, 165-169.
4. O. Treutler and R. Ahlrichs, *J. Chem. Phys.*, 1995, **102**, 346-354.
5. K. Eichkorn, O. Treutler, H. Ohm, M. Haser and R. Ahlrichs, *Chem. Phys. Lett.*, 1995, **242**, 652-660.
6. K. Eichkorn, F. Weigend, O. Treutler and R. Ahlrichs, *Theor. Chem. Acc.*, 1997, **97**, 119-124.
7. A. D. Becke, *Phys. Rev. A*, 1988, **38**, 3098-3100.
8. S. H. Vosko, L. Wilk and M. Nusair, *Can. J. Phys.*, 1980, **58**, 1200-1211.
9. J. P. Perdew, *Phys. Rev. B* 1986, **33**, 8822-8824
10. F. Weigend and R. Ahlrichs, *Phys. Chem. Chem. Phys.*, 2005, **7**, 3297-3305.

Supplementary Material (ESI) for Dalton Transactions

This journal is (c) The Royal Society of Chemistry 2011

11. I. J. Hewitt, J. K. Tang, N. T. Madhu, R. Clerac, G. Buth, C. E. Anson and A. K. Powell, *Chem. Commun.*, 2006, 2650-2652.
12. L. Laaksonen, Center for Scientific Computing, (Espoo, Finland, Version 3.0), Editon edn., 2005.
